# Supplementary material for: A hierarchically structured composite of Mn3O4/3D graphene foam for flexible nonenzymatic biosensors
Source: Royal Society of Chemistry journal article supplement (doi:10.1039/c2tb00073c), 2012-09-26
Supplement: c2tb00073c.pdf [file c2tb00073c.pdf]

*Supporting Information*

## **Hierarchically Structured Composite of $\text{Mn}_3\text{O}_4$ /3D Graphene Foam for Flexible Nonenzymatic Biosensors**

**Peng Si, Xiao-Chen Dong, Peng Chen and Dong-Hwan Kim\***

Division of Bioengineering, School of Chemical and Biomedical Engineering, Nanyang Technological University, 70 Nanyang Drive, Singapore 637457

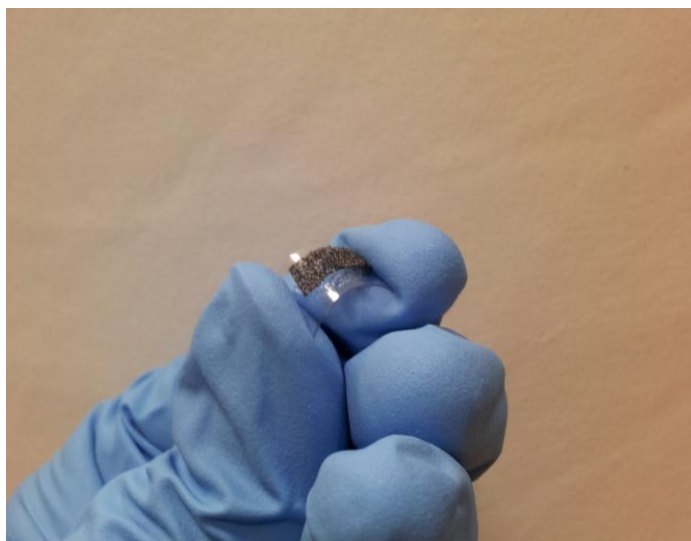

**Figure S1.** Photograph of the Flexible biosensor based on  $\text{Mn}_3\text{O}_4$ /3DGF freestanding electrode.

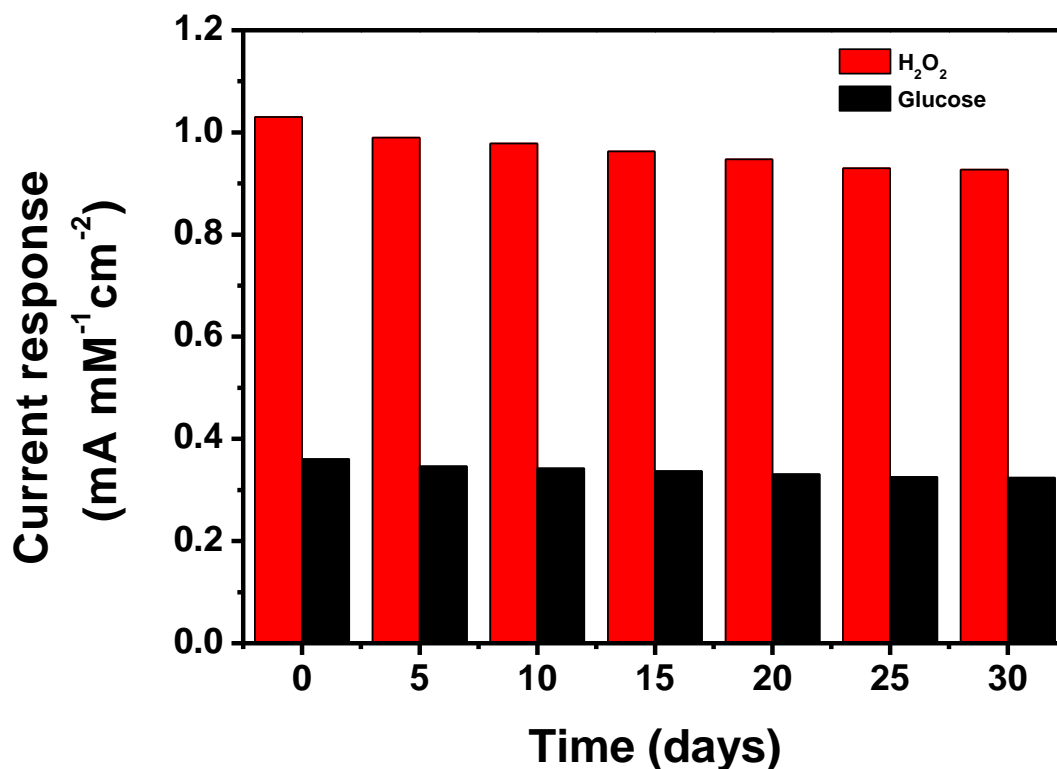

**Figure S2.** The current response of the Mn<sub>3</sub>O<sub>4</sub>/3DGF biosensor for 1 mM H<sub>2</sub>O<sub>2</sub> and 1 mM glucose over one month period.

**Table S1.** The relative current change of various interferents to 0.1 mM H<sub>2</sub>O<sub>2</sub> (%) on the Mn<sub>3</sub>O<sub>4</sub>/3DGF electrode at the potential of 0 V.

| Interferent   | 0.05 mM | 0. 1 mM | 0. 5 mM | 5 mM |
|---------------|---------|---------|---------|------|
| Glucose       | 0       | 0       | 0       | 0.3  |
| Fructose      | 0       | 0       | 0       | 0.5  |
| Glutamine     | 0       | 0       | 0       | 0.2  |
| Ascorbic acid | 0       | 0       | 3.8     | 7.6  |
| Uric acid     | 0       | 0       | 0.5     | 1.0  |
| Nitrite       | 0       | 0       | 0.6     | 2.9  |

**Table S2.** The recovery results of H<sub>2</sub>O<sub>2</sub> determination in milk samples.

| Sample | Tested value (mM) | R.S.D (%) | Added (mM) | Recovery (%) |
|--------|-------------------|-----------|------------|--------------|
| 1      | 0.105             | 3.87      | 0.100      | 95.23        |
| 2      | 0.192             | 4.98      | 0.200      | 96.00        |
| 3      | 0.314             | 4.62      | 0.300      | 95.54        |

\* R.S.D (%) was calculated from three independent experiments.
